# Supplementary material for: A Pumpkin-Based Emulsion Gel as a Texture Improvement of Mixed Horsemeat Semi-Smoked Sausages
Source: MDPI journal article supplement (doi:10.3390/foods11233886), 2022-12-01
Supplement: s1 [file s1]

### Supplementary Material S1

**Table S1.** Color parameters ( $L^*$ ,  $a^*$ ,  $b^*$ ) and pH of pumpkin-based emulsion gel (PEG), and horse fat (HF) at 25 °C (solid-state).

| Parameters | PEG                     | HF                        |
|------------|-------------------------|---------------------------|
| $L^*$      | 66.66±0.59 <sup>a</sup> | 57.7±6.49 <sup>a</sup>    |
| $a^*$      | 1.36±0.15 <sup>b</sup>  | -4.97±1.48 <sup>a</sup>   |
| $b^*$      | 7.90±1.24 <sup>b</sup>  | -11.94±7.17 <sup>ab</sup> |
| pH         | 6.37±0.25 <sup>a</sup>  | 6.51±0.13 <sup>a</sup>    |

Samples with identical letters in the same row did not present statistical differences ( $p > 0.05$ ).
